# Supplementary material
Source: PubMed Central journal article supplement (PMC6087467)
Supplement: NIHMS982891-supplement-Supplemental_Information.pdf [file NIHMS982891-supplement-Supplemental_Information.pdf]

## *Supporting Information*

# **Aptamer Recognition of Multiplexed Small-Molecule-Functionalized Substrates**

Nako Nakatsuka,<sup>1,2</sup> Huan H. Cao,<sup>1,2</sup> Stephanie Deshayes,<sup>3</sup> Arin L. Melkonian,<sup>3</sup>  
Andrea M. Kasko,<sup>2,3</sup> Paul S. Weiss,<sup>1,2,4</sup> and Anne M. Andrews<sup>1,2,5\*</sup>

<sup>1</sup>Department of Chemistry and Biochemistry, <sup>2</sup>California NanoSystems Institute,  
<sup>3</sup>Department of Bioengineering, <sup>4</sup>Department of Materials Science and Engineering,  
<sup>5</sup>Department of Psychiatry and Biobehavioral Sciences, Semel Institute for Neuroscience &  
Human Behavior, and Hatos Center for Neuropharmacology, University of California, Los  
Angeles, Los Angeles, CA 90095, United States

\*To whom correspondence should be addressed: [aandrews@mednet.ucla.edu](mailto:aandrews@mednet.ucla.edu)

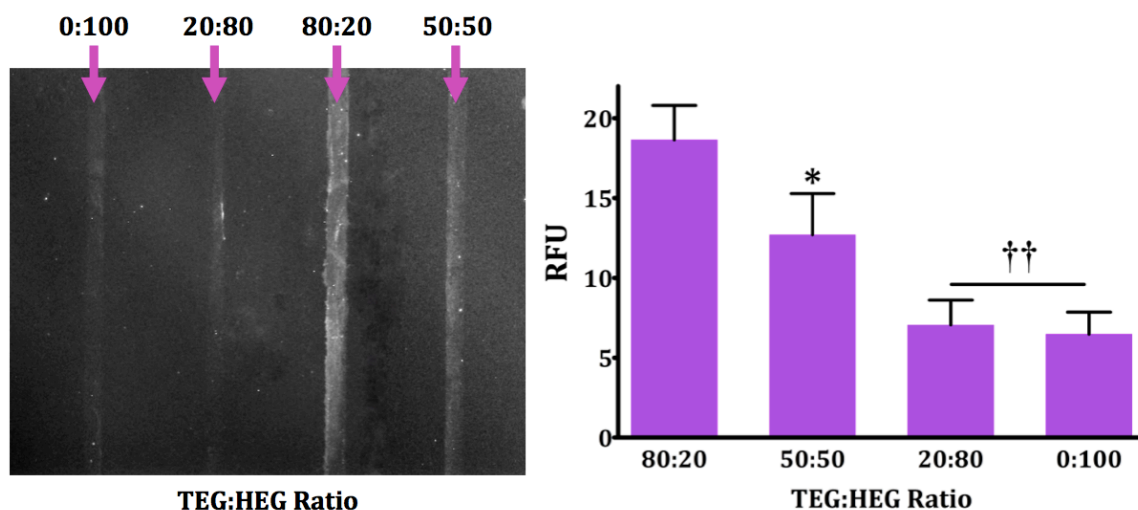

**Figure S1.** Optimizing surface-tethered small molecule densities. **(Left)** Different ratios of hydroxyl-terminated alkanethiols (background molecules; hydroxyl triethylene glycol (undecanethiol) (TEG)) vs. carboxyl-terminated alkanethiols (small-molecule tethers; carboxyl hexa(ethylene glycol) undecanethiol (HEG)) were incubated in each channel. Representative fluorescence image for dopamine aptamer recognition of dopamine functionalized channels. **(Right)** Maximal relative fluorescence intensities were observed for 80% TEG:20% HEG. This ratio was used for all subsequent experiments. Error bars are standard errors of the means for  $N=3$  substrates. Group means were significantly different  $*P<0.05$  and  $††P<0.01$  vs. the 80:20 TEG:HEG ratio.

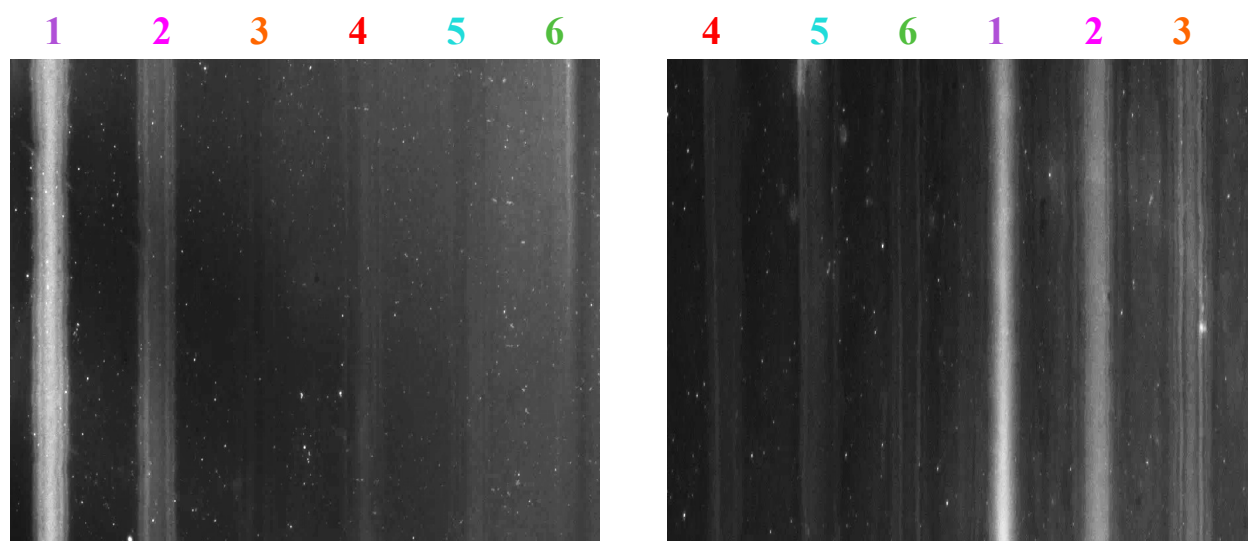

1 – 20  $\mu\text{M}$  DA aptamer + 0  $\mu\text{M}$  DA  
 2 – 20  $\mu\text{M}$  DA aptamer + 0.1  $\mu\text{M}$  DA  
 3 – 20  $\mu\text{M}$  DA aptamer + 1.0  $\mu\text{M}$  DA

4 – 20  $\mu\text{M}$  DA aptamer + 10  $\mu\text{M}$  DA  
 5 – 20  $\mu\text{M}$  DA aptamer + 20  $\mu\text{M}$  DA  
 6 – 20  $\mu\text{M}$  DA aptamer + 50  $\mu\text{M}$  DA

**Figure S2.** Representative fluorescence images for the competitive displacement experiment to investigate reversible binding of the dopamine (DA) aptamer to surface-tethered dopamine. A different concentration of free dopamine (0-50  $\mu\text{M}$ ) was added to each channel in different orders on different substrates. Binding was quantified for  $N=4$  substrates in Figure 3A.

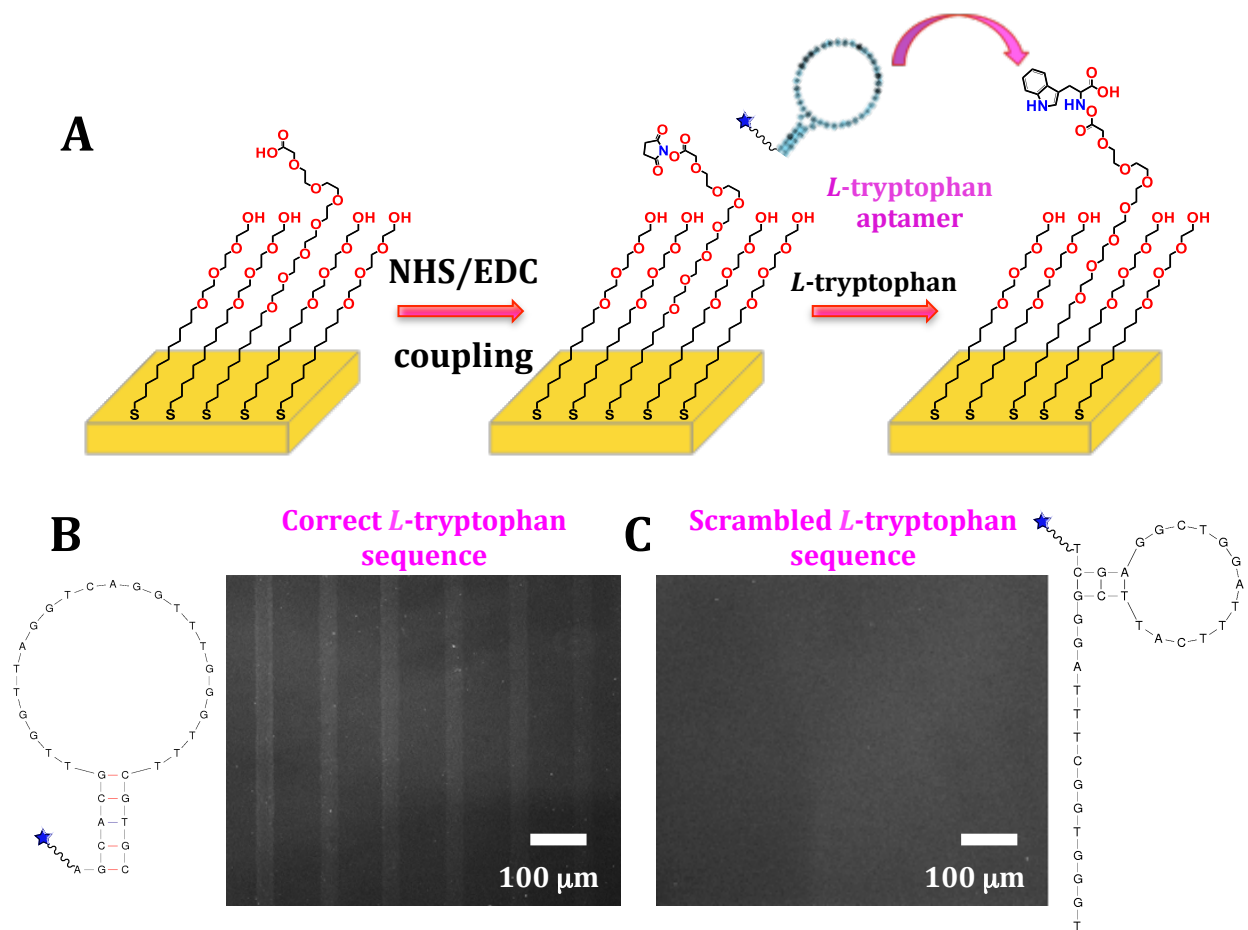

**Figure S3.** *L*-Tryptophan aptamer capture on patterned substrates. **(A)** Schematic (not to scale) of patterning and functionalization of *L*-tryptophan. **(B)** Substrates were incubated with the 34-base *L*-tryptophan-specific aptamer sequence or **(C)** a scrambled sequence with the same numbers of each nucleotide as the correct sequence but randomized to generate a different secondary structure. The secondary structure of the correct and scrambled sequences were generated using *Mfold*. Substrates were imaged at an emission wavelength of 525 nm for AlexaFluor® 488 (excitation at 490 nm).

**A** Dopamine aptamer  
vs.  
Surface-tethered *L*-tryptophan

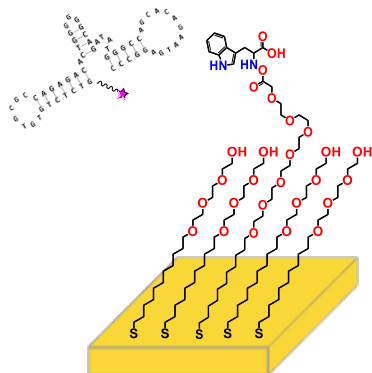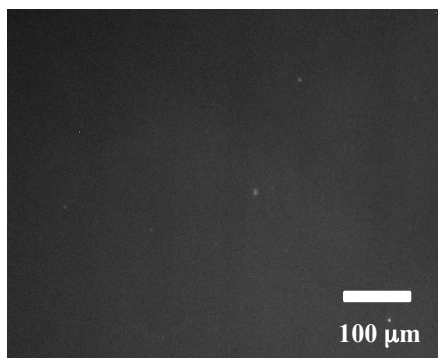

**B** *L*-tryptophan aptamer  
vs.  
Surface-tethered dopamine

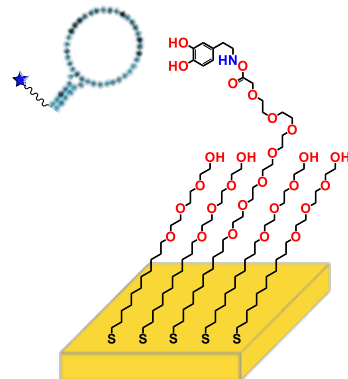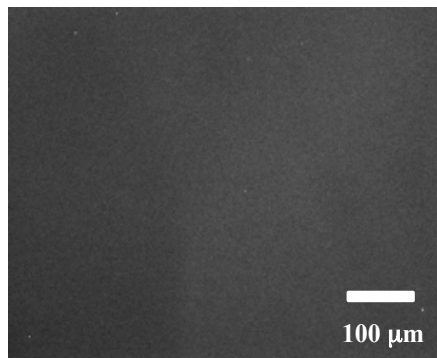

**Figure S4.** Selectivity of dopamine and *L*-tryptophan aptamers. **(A)** Patterned *L*-tryptophan-functionalized substrates imaged at an emission wavelength of 605 nm for AlexaFluor® 546 (excitation at 556 nm) to visualize bound dopamine aptamers. **(B)** Patterned dopamine-functionalized substrates imaged at an emission wavelength of 525 nm for AlexaFluor® 488 (excitation at 490 nm) to visualize bound *L*-tryptophan aptamers. In both cases, no observable patterns were detected indicating minimal cross-reactivity for the incorrect targets.
